# Supplementary material
Source: PubMed Central journal article supplement (PMC3622324)
Supplement: supp_M033423_jlr.M033423-1.pdf [file supp_M033423_jlr.M033423-1.pdf]

### Supplementary Table I

**Effect of FXR agonists on body weight, liver weight and liver lipid content in *Ldlr* <sup>-/-</sup> mice and hamsters.** Male *Ldlr* <sup>-/-</sup> mice and Syrian hamsters were treated for 5 or 11 days respectively with either vehicle alone, RO5186026, X-Ceptor, 6-ECDCA (all at 30 mg/kg/d) or GW4064 (100 mg/kg/d). Liver lipids were measured as described in Methods. Values are means  $\pm$  S.E. (n =6-8/grp). Significant differences between the vehicle and compound treated groups (\*: p<0.05, \*\*: p<0.01) were determined by Wilcoxon/Kruskal-Wallis tests.

| Treatment                              | Terminal Body Weight (g) | Liver Weight (g)   | Liver Cholesterol (mg/g) | Liver Triglycerides (mg/g) |
|----------------------------------------|--------------------------|--------------------|--------------------------|----------------------------|
| <b><i>Ldlr</i> <sup>-/-</sup> mice</b> |                          |                    |                          |                            |
| Vehicle                                | 21.8 $\pm$ 0.2           | 1.055 $\pm$ 0.120  | 2.16 $\pm$ 0.08          | 11.37 $\pm$ 0.69           |
| RO5186026                              | 22.0 $\pm$ 0.5           | 1.196 $\pm$ 0.049  | 1.71 $\pm$ 0.10 *        | 7.18 $\pm$ 0.84 **         |
| X-Ceptor                               | 21.6 $\pm$ 0.4           | 1.096 $\pm$ 0.021  | 1.76 $\pm$ 0.12 *        | 6.74 $\pm$ 0.62 **         |
| 6-ECDCA                                | 21.7 $\pm$ 0.5           | 1.086 $\pm$ 0.045  | 2.12 $\pm$ 0.07          | 6.89 $\pm$ 0.33 **         |
| GW4064                                 | 21.5 $\pm$ 0.6           | 1.033 $\pm$ 0.040  | 2.11 $\pm$ 0.07          | 8.09 $\pm$ 0.35 **         |
| <b>Syrian Hamsters</b>                 |                          |                    |                          |                            |
| Vehicle                                | 144.8 $\pm$ 1.5          | 6.36 $\pm$ 0.15    | 2.76 $\pm$ 0.19          | 3.63 $\pm$ 0.56            |
| RO5186026                              | 151.6 $\pm$ 3.3          | 7.85 $\pm$ 0.32 ** | 2.69 $\pm$ 0.30          | 2.77 $\pm$ 0.07            |
| X-Ceptor                               | 148.9 $\pm$ 2.3          | 7.21 $\pm$ 0.30 *  | 3.14 $\pm$ 0.37          | 3.38 $\pm$ 0.29            |
| 6-ECDCA                                | 138.8 $\pm$ 2.7          | 6.33 $\pm$ 0.29    | 2.84 $\pm$ 0.11          | 2.29 $\pm$ 0.15            |
| GW4064                                 | 147.1 $\pm$ 2.2          | 7.29 $\pm$ 0.22 ** | 3.14 $\pm$ 0.37          | 3.12 $\pm$ 0.16            |
