# Supplementary material
Source: PubMed Central journal article supplement (PMC3622324)

## Supplementary figure I

**Effect of FXR agonists on the distribution of BA between liver + gallbladder and small intestine in *Ldlr*<sup>-/-</sup> mice and hamsters.** Male *Ldlr*<sup>-/-</sup> mice and Syrian hamsters were treated for 5 or 11 days respectively with either vehicle alone, RO5186026, X-Ceptor, 6-ECDCA (all at 30 mg/kg/d) or GW4064 (100 mg/kg/d). BA were measured in the livers + gallbladders (L+GB) and small intestines 2 hours after the last dose and the ratio of BA in the livers + gallbladders vs the small intestines was calculated. Values are means +/- S.E. (n =6/grp except where indicated). Significant differences between the vehicle and compound treated groups (\*\*: p<0.01) were determined by ANOVA followed by Dunnett's test.

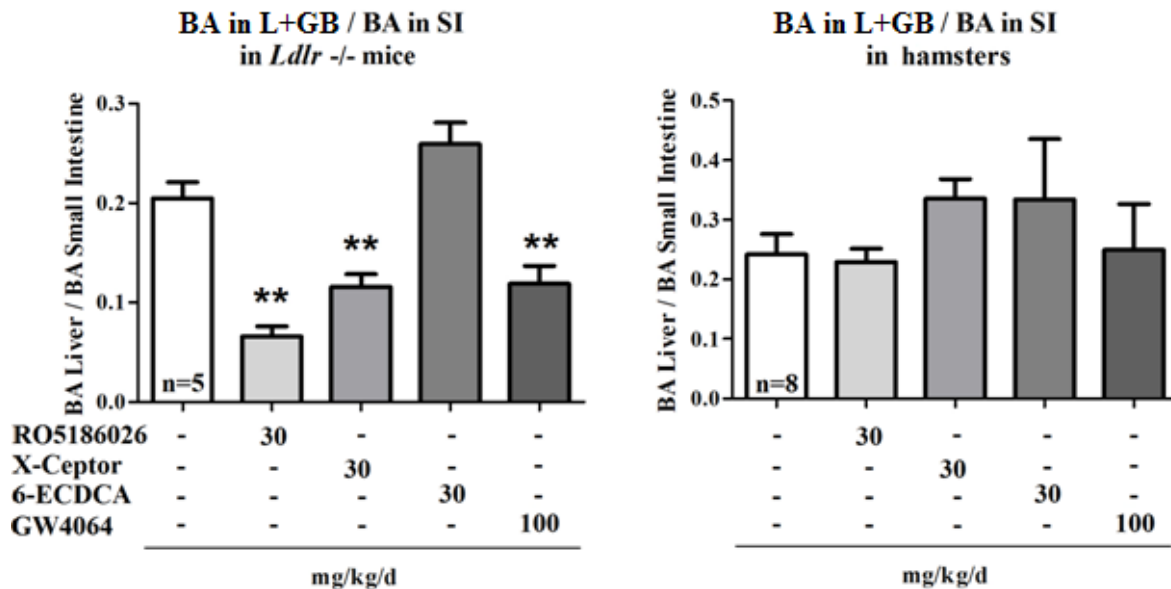

Supplement: supp_M033423_jlr.M033423-2.pdf [file supp_M033423_jlr.M033423-2.pdf]
