# Supplementary material
Source: PubMed Central journal article supplement (PMC3622324)

## Supplementary figure II

**Effect of FXR agonists on fecal BA excretion in *Ldlr*<sup>-/-</sup> mice and hamsters.** Male *Ldlr*<sup>-/-</sup> mice and male Syrian hamsters were treated for 5 or 11 days respectively with either vehicle alone, RO5186026, X-Ceptor, 6-ECDCA (all at 30mg/kg/d) or GW4064 (100mg/kg/d). BA were measured in the feces produced over the last 3 days as described in Methods. The data are expressed as means  $\pm$  S.E. (n = 6-8/grp). Significant differences between the vehicle and compound treated groups (\*\*: p < 0.01) were determined by ANOVA followed by Dunnett's test.

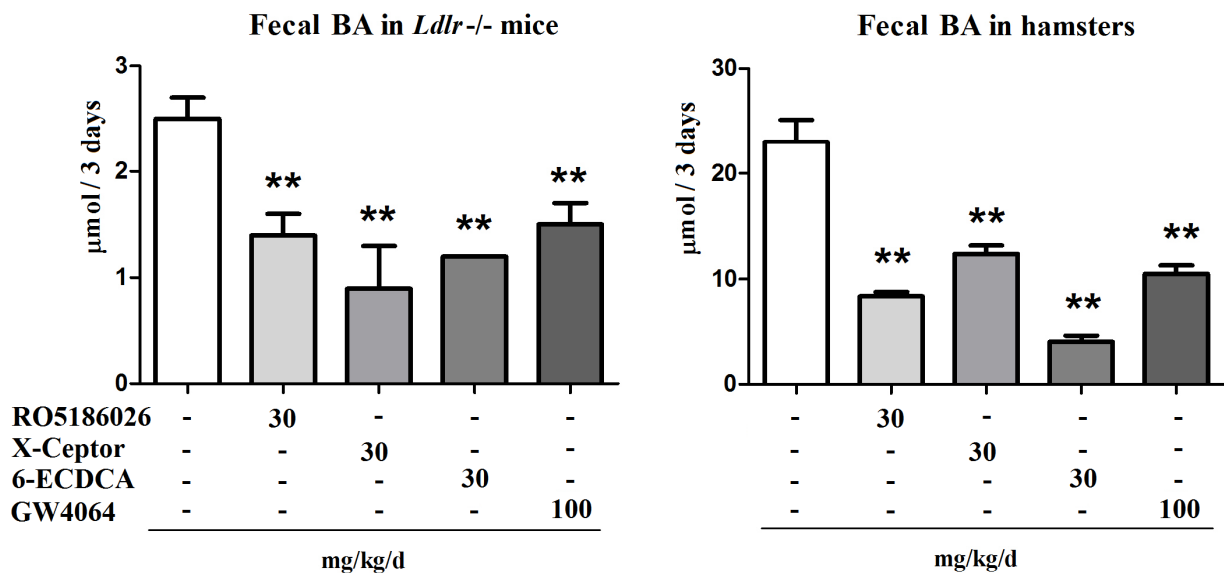

Supplement: supp_M033423_jlr.M033423-3.pdf [file supp_M033423_jlr.M033423-3.pdf]
