# Supplementary material
Source: PubMed Central journal article supplement (PMC3622324)

### Supplementary figure III

#### Effects of extended FXR agonist treatment on the expression of *Ibabp* and *Fgf15/19* in

*Ldlr*<sup>-/-</sup> mouse and hamster small intestines. Male *Ldlr*<sup>-/-</sup> mice and hamsters were treated for either 5 or 8 days respectively with either vehicle alone (pale grey) or RO5186026 (30mg/kg/d, dark grey). *Ibabp* and *Fgf15/19* expression were measured 2h post-dosing in the duodenum, jejunum and ileum. Values are means  $\pm$  S.E. ( $n=6-8$ / grp). Significant differences between the groups were determined by Wilcoxon/ Kruskal-Wallis test (\*:  $p < 0.05$ , \*\*:  $p < 0.01$ ).

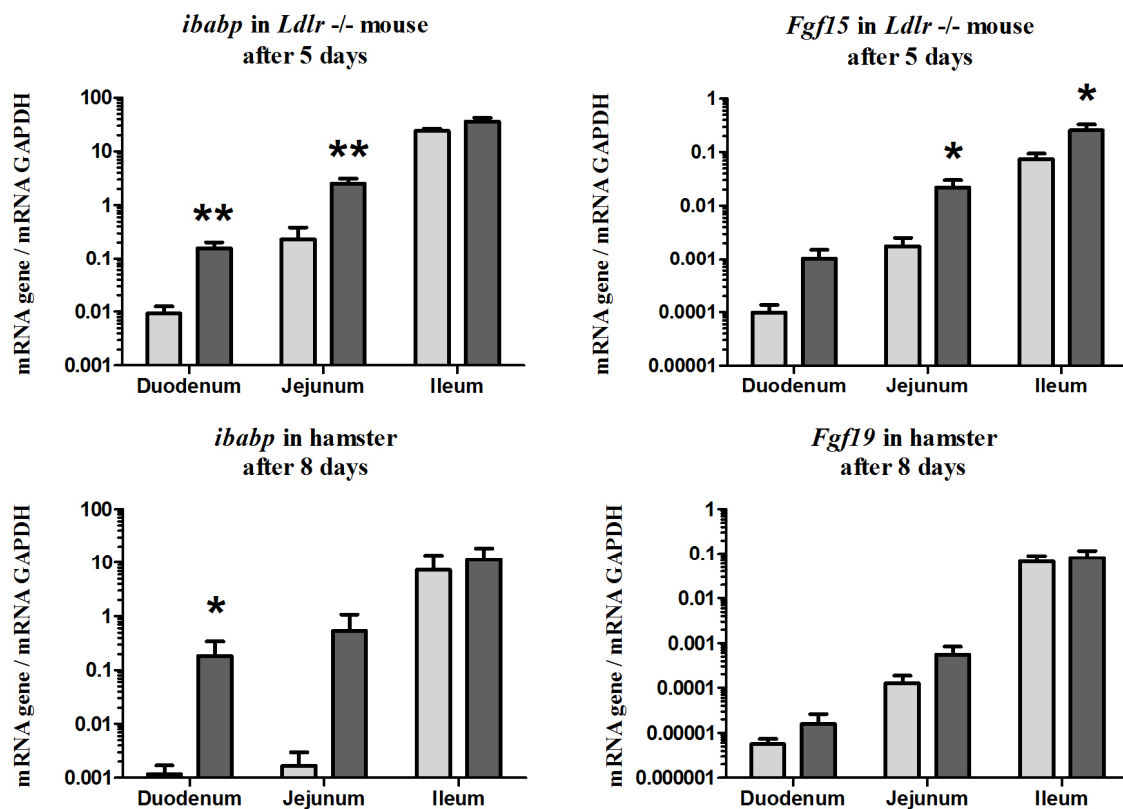

Supplement: supp_M033423_jlr.M033423-4.pdf [file supp_M033423_jlr.M033423-4.pdf]
