# Supplementary material
Source: PubMed Central journal article supplement (PMC3622324)
Supplement: supp_M033423_jlr.M033423-5.pdf [file supp_M033423_jlr.M033423-5.pdf]

## Supplementary figure IV

### Comparison of human, mouse and hamster FXR sequences

The amino acid sequences of human, Syrian hamster and mouse FXR (NR1H4) were aligned and consensus coloring applied. Cyan, blue, grey, and white indicate decreasing levels of column-wise similarity scores calculated using the BLOSUM62 similarity matrix. The ligand binding domain (← LBD →) is highlighted.

|                 |            |            |            |            |            |            |     |     |
|-----------------|------------|------------|------------|------------|------------|------------|-----|-----|
| HUMAN           | MVMQFQGLEN | PIQISPHCS  | TPSGFMTMM  | SMKPAKGLT  | EQVAGPLGQN | LEVEPYSQYS | 60  |     |
| HAMSTER         | MVMQRQGLEN | PVQVSLHSH  | RLSGFVPTVM | SLKPAKGLT  | EQEAGALGQN | LDLEAYSFYS | 60  |     |
| MOUSE           | MVMQFQGLEN | PIQISLHSH  | RLSGFVPTGM | SVKPAKGLT  | EHAAGPLGQN | LDLESYSFYN | 60  |     |
|                 |            |            |            |            |            |            |     |     |
| HUMAN           | NVQFPQVQPQ | ISSSSYSNL  | GFYPQQPEEW | YSPGIYELRR | MPAETLYQGE | TEVAEMPVTK | 120 |     |
| HAMSTER         | NVQFPQVQPQ | ISSSSYSNL  | GFYPQQPEEW | YSPGIYELRR | MPAETVYQGE | TEVSEMPVTK | 120 |     |
| MOUSE           | NVPFPQVQPQ | ISSSSYSNL  | GFYPQQPEDW | YSPGIYELRR | MPAETGYQGE | TEVSEMPVTK | 120 |     |
|                 |            |            |            |            |            |            |     |     |
| HUMAN           | KPRMGASAG  | RIKGDELCCV | CGDRASGYHY | NALTCEGCKG | FFRRSITKNA | VYKCKNGGNC | 180 |     |
| HAMSTER         | KPRMATAAAG | RIKGDELCCV | CGDRASGYHY | NALTCEGCKG | FFRRSITKNA | VYKRKNGGSC | 180 |     |
| MOUSE           | KPRMAAASAG | RIKGDELCCV | CGDRASGYHY | NALTCEGCKG | FFRRSITKNA | VYKCKNGGNC | 180 |     |
|                 |            |            |            |            |            |            |     |     |
| HUMAN           | VMDMYMRRKC | QECRLRKCKE | MGMLAECMYT | GLLTEIQCKS | KRLRKNVKQH | ADQTVNE.DS | 240 |     |
| HAMSTER         | VMDMYMRRKC | QECRLRKCKE | MGMLAECMYT | GLLTEIQCKS | KRLRKNVKQH | ADKTVNE.DR | 239 |     |
| MOUSE           | VMDMYMRRKC | QECRLRKCKE | MGMLAECMYT | GLLTEIQCKS | KRLRKNVKQH | ADQTVNE.DS | 240 |     |
|                 |            |            |            |            |            |            |     |     |
| HUMAN           | EGRDLRQVTS | TTKSCREKTE | LTPDQQTLLH | FIMDSYNKQR | MPQEITNKIL | KEEFSAEENF | 300 |     |
| HAMSTER         | EGRDLRQVTS | TTKSCREKTE | LTPDQQNLLD | YITDSYSKQR | MPQEITNKIL | KEEFSAEENF | 299 |     |
| MOUSE           | EGRDLRQVTS | TTKFCREKTE | LTADQQTLLD | YIMDSYNKQR | MPQEITNKIL | KEEFSAEENF | 300 |     |
|                 |            |            |            |            |            |            |     |     |
| <-----LBD-----> |            |            |            |            |            |            |     |     |
|                 |            |            |            |            |            |            |     |     |
| HUMAN           | LILTEMATNH | VQVLVEFTKK | LPGFQTLDE  | DQIALKGS   | VEAMFLRSAE | IFNKKLPSGH | 360 |     |
| HAMSTER         | LILTEMATSH | VQVLVEFTKK | LPGFQTLDE  | DQIALKGS   | VEAMFLRSAE | IFNKKLPAGH | 359 |     |
| MOUSE           | LILTEMATSH | VQILVEFTKK | LPGFQTLDE  | DQIALKGS   | VEAMFLRSAE | IFNKKLPAGH | 360 |     |
|                 |            |            |            |            |            |            |     |     |
| -----LBD-----   |            |            |            |            |            |            |     |     |
|                 |            |            |            |            |            |            |     |     |
| HUMAN           | SDLLEERIRN | SGISDEYITP | MFSFYKSGE  | LKMTQEEYAL | LTAIVILSPD | RQYIKDREAV | 420 |     |
| HAMSTER         | ADLLEERIRN | SGISAEYITP | MFSFYKSGE  | LKMTQEEYAL | LTAIVILSPD | RQYIKDREAV | 419 |     |
| MOUSE           | ADLLEERIRK | SGISDEYITP | MFSFYKSVGE | LKMTQEEYAL | LTAIVILSPD | RQYIKDREAV | 420 |     |
|                 |            |            |            |            |            |            |     |     |
| -----LBD-----   |            |            |            |            |            |            |     |     |
|                 |            |            |            |            |            |            |     |     |
| HUMAN           | EKLQEPLLDV | LQKLCKIHQP | ENPQHFACLL | GRLTELRTFN | HHHAEMLSW  | RVNDHKFTPL | 480 |     |
| HAMSTER         | ERLQEPLLEV | LQKLCKIYQP | ENPQHFACLL | GRLTELRTFN | HHHAEMLSW  | RVNDHKFTPL | 479 |     |
| MOUSE           | EKLQEPLLDV | LQKLCKMYQP | ENPQHFACLL | GRLTELRTFN | HHHAEMLSW  | RVNDHKFTPL | 480 |     |
|                 |            |            |            |            |            |            |     |     |
| -----LBD----->  |            |            |            |            |            |            |     |     |
|                 |            |            |            |            |            |            |     |     |
| HUMAN           | LCEIWDVQ   | 488        |            |            |            |            |     | 488 |
| HAMSTER         | LCEIWDVQ   | 486        |            |            |            |            |     | 486 |
| HAMSTER         | LCEIWDVQ   | 487        |            |            |            |            |     | 487 |
| MOUSE           | LCEIWDVQ   | 488        |            |            |            |            |     | 488 |
